# Supplementary material for: Protective function of interleukin‐22 in pulmonary fibrosis
Source: PubMed Central journal article supplement (PMC8387792; doi:10.1002/ctm2.509), 2021-08-26

# Supplemental Figure. 1

**A**

Wildtype mice

IL-22R<sup>-/-</sup> mice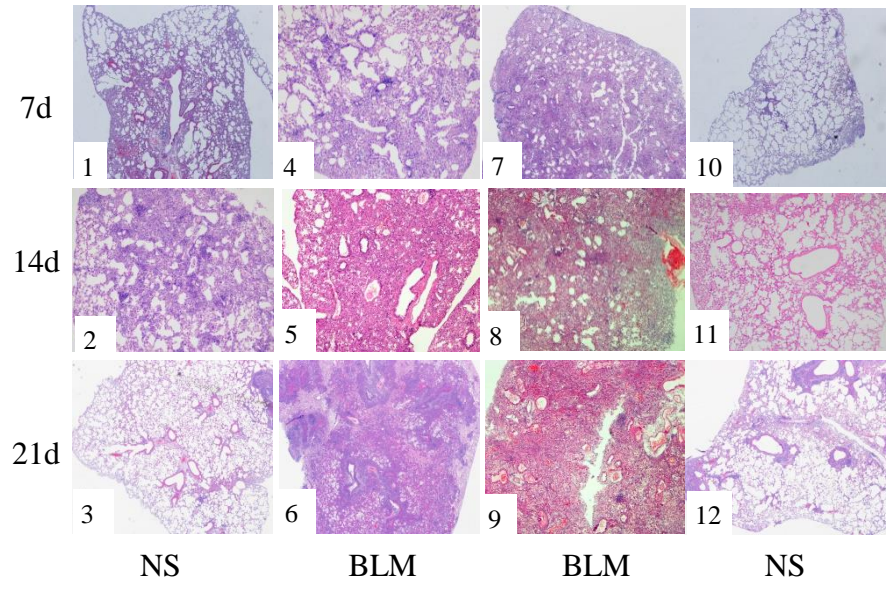

H &amp; E staining

**B**

Wildtype mice

IL-22R<sup>-/-</sup> mice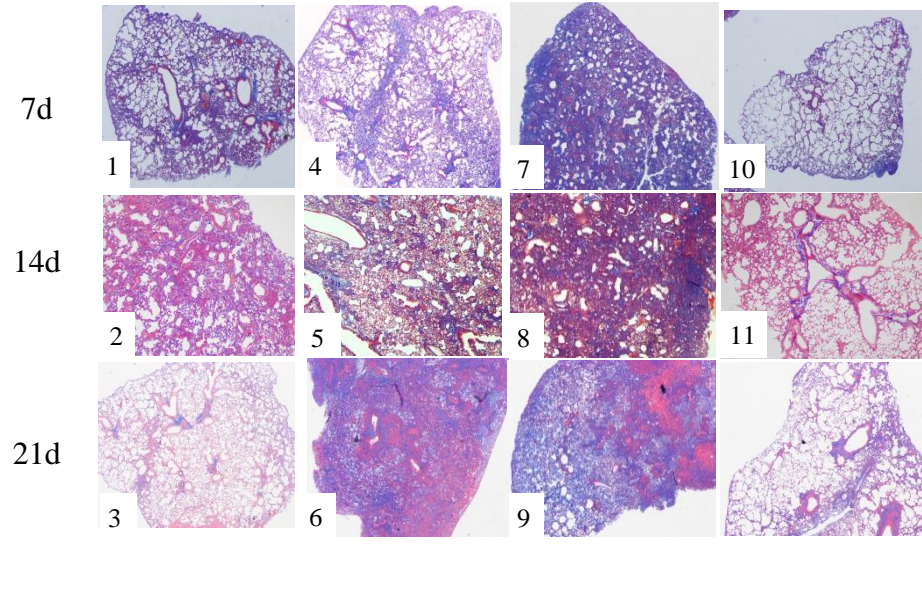

Masson's staining

## Supplemental Figure. 2

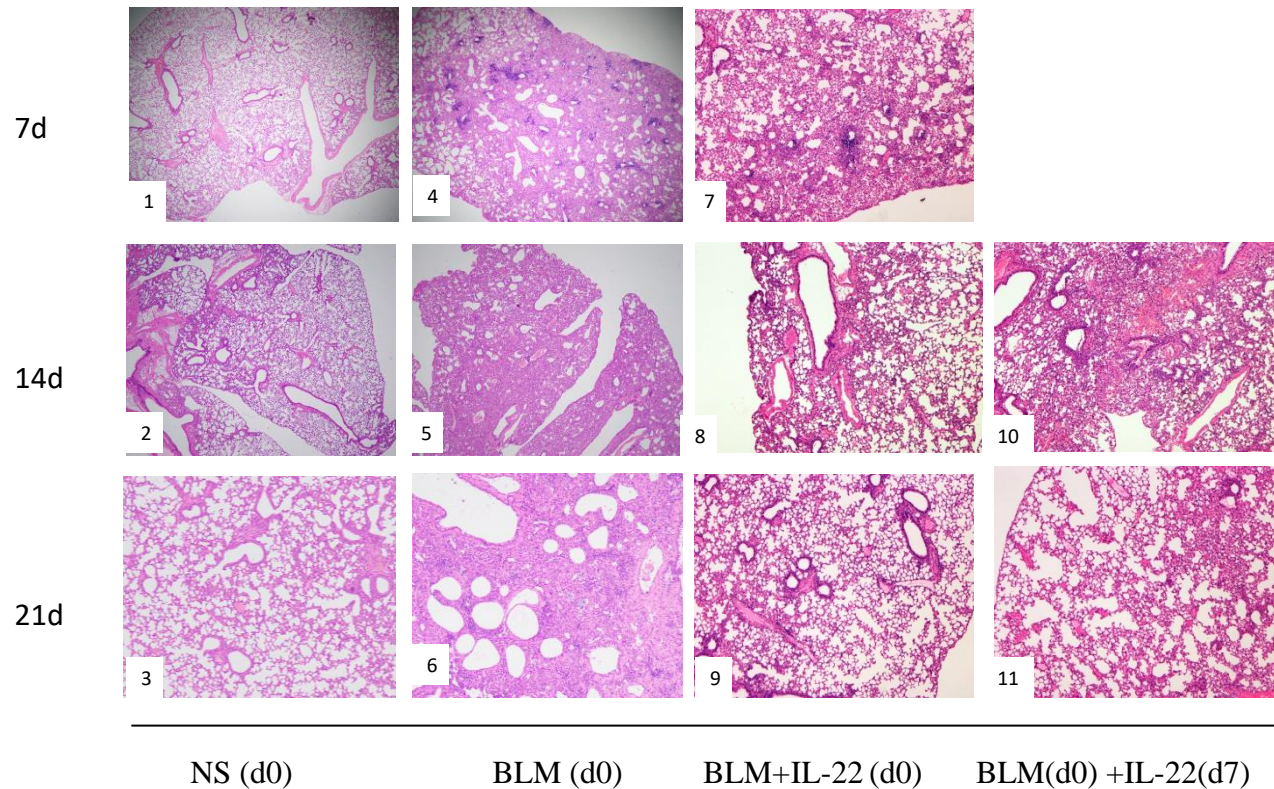

# Supplemental Figure. 3

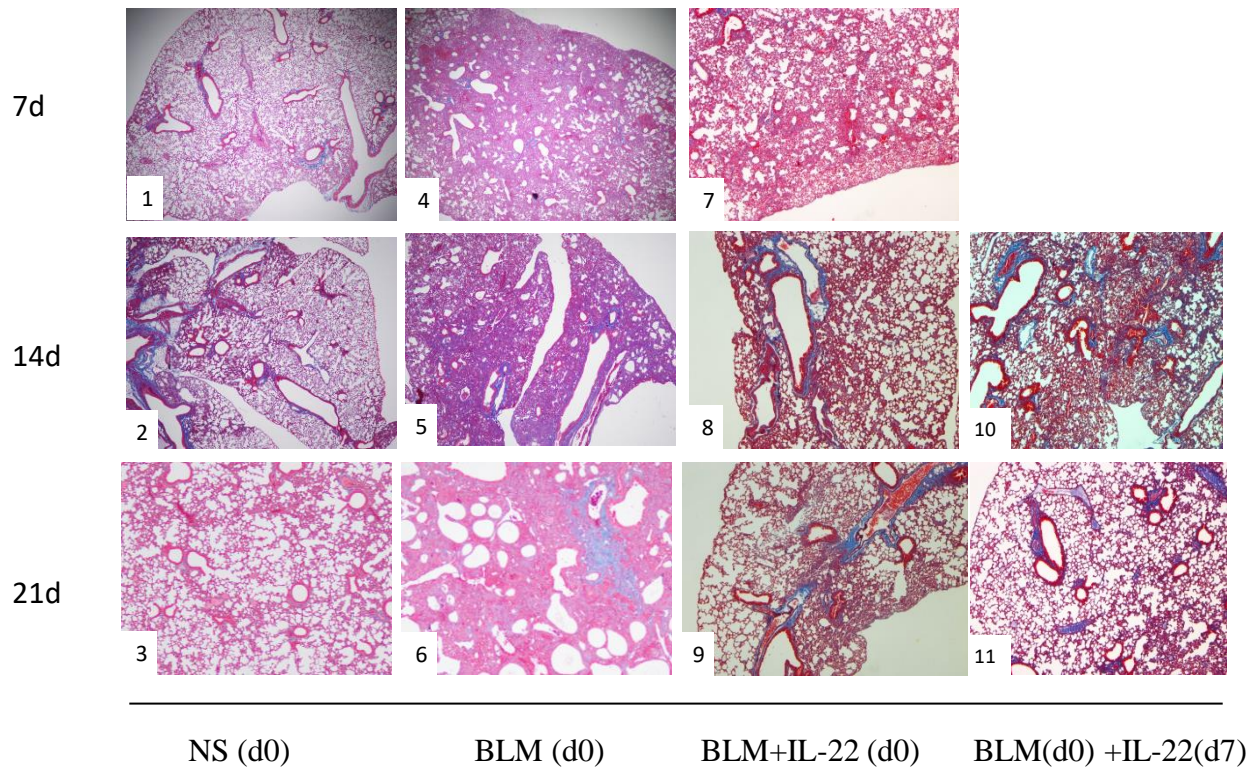

Supplemental Figure. 4

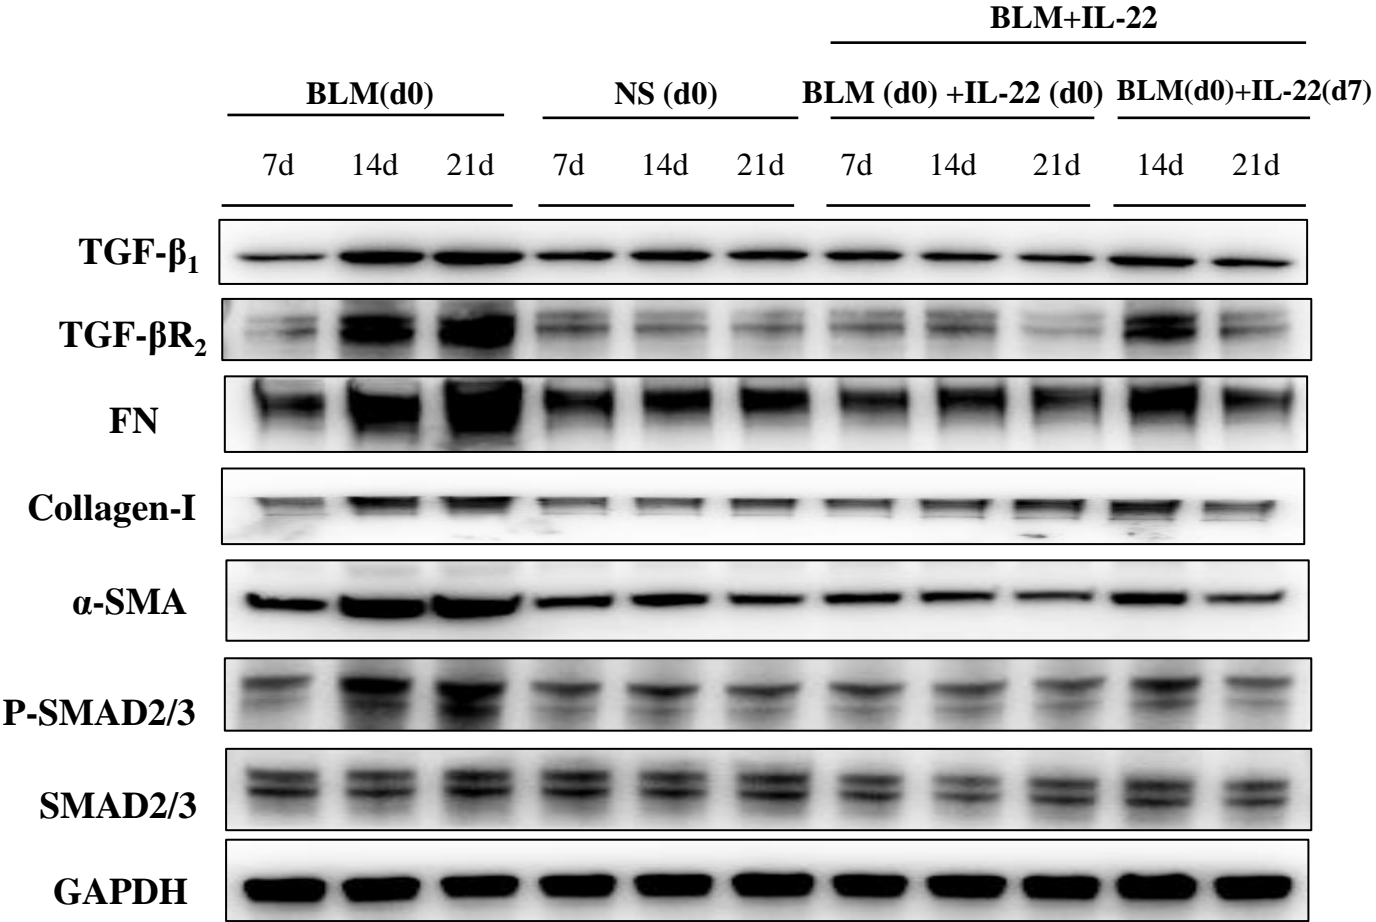

Supplemental Figure. 5

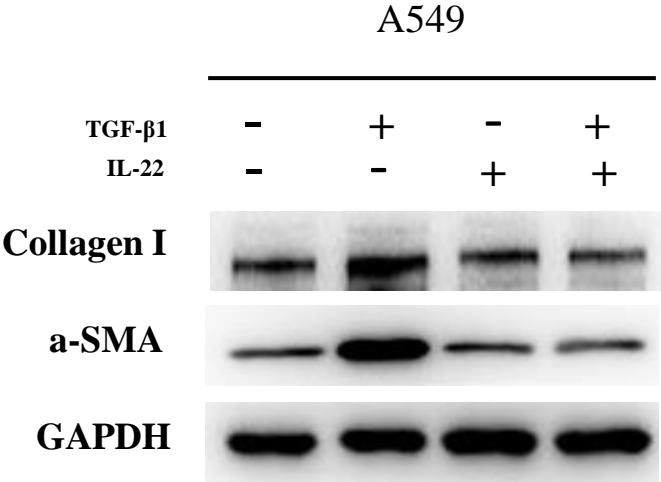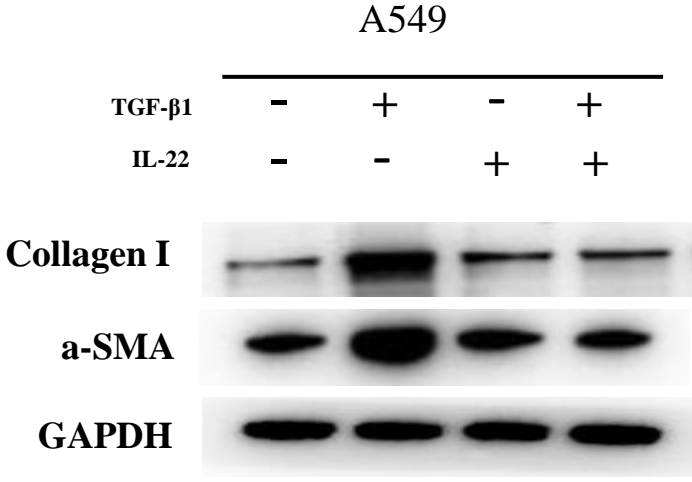

# Supplemental Figure. 6

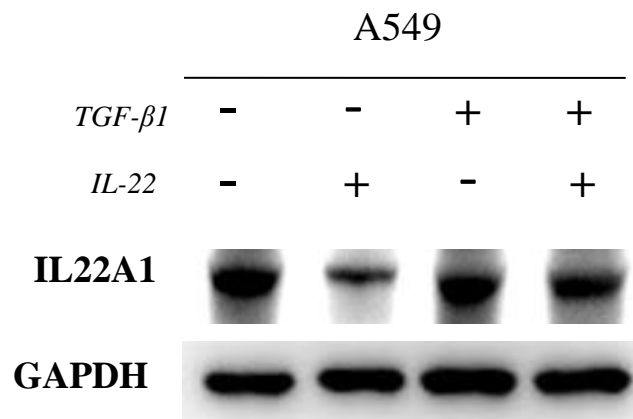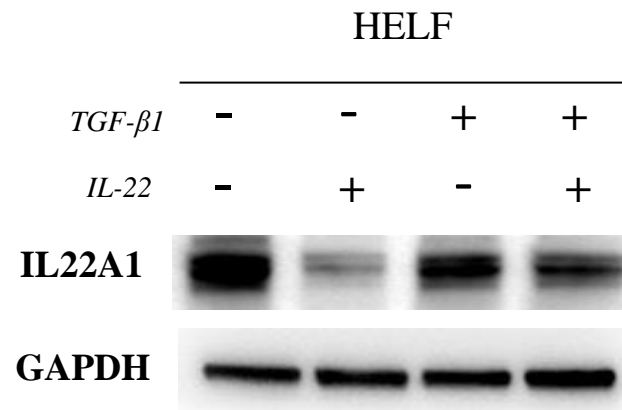

Supplement: CTM2-11-e509-s003.pdf [file CTM2-11-e509-s003.pdf]
